# Supplementary material for: Development of magnetic ytterbium oxide core–shell particles for selectively trapping phosphopeptides
Source: Royal Society of Chemistry journal article supplement (doi:10.1039/c5ay03423j), 2016-01-01

Electron Micro Probe, JEOL JSM 8100LV, non-coated samples

Batch 1:  $\text{Fe}_3\text{O}_4@\text{SiO}_2@\text{Yb}_2\text{O}_3$ : Fe 40.6 % Si 15.7 % Yb 3.0 %

Batch 2:  $\text{Fe}_3\text{O}_4@\text{SiO}_2@\text{Yb}_2\text{O}_3$ : Fe 41.1 % Si 13.0 % Yb 2.2 %

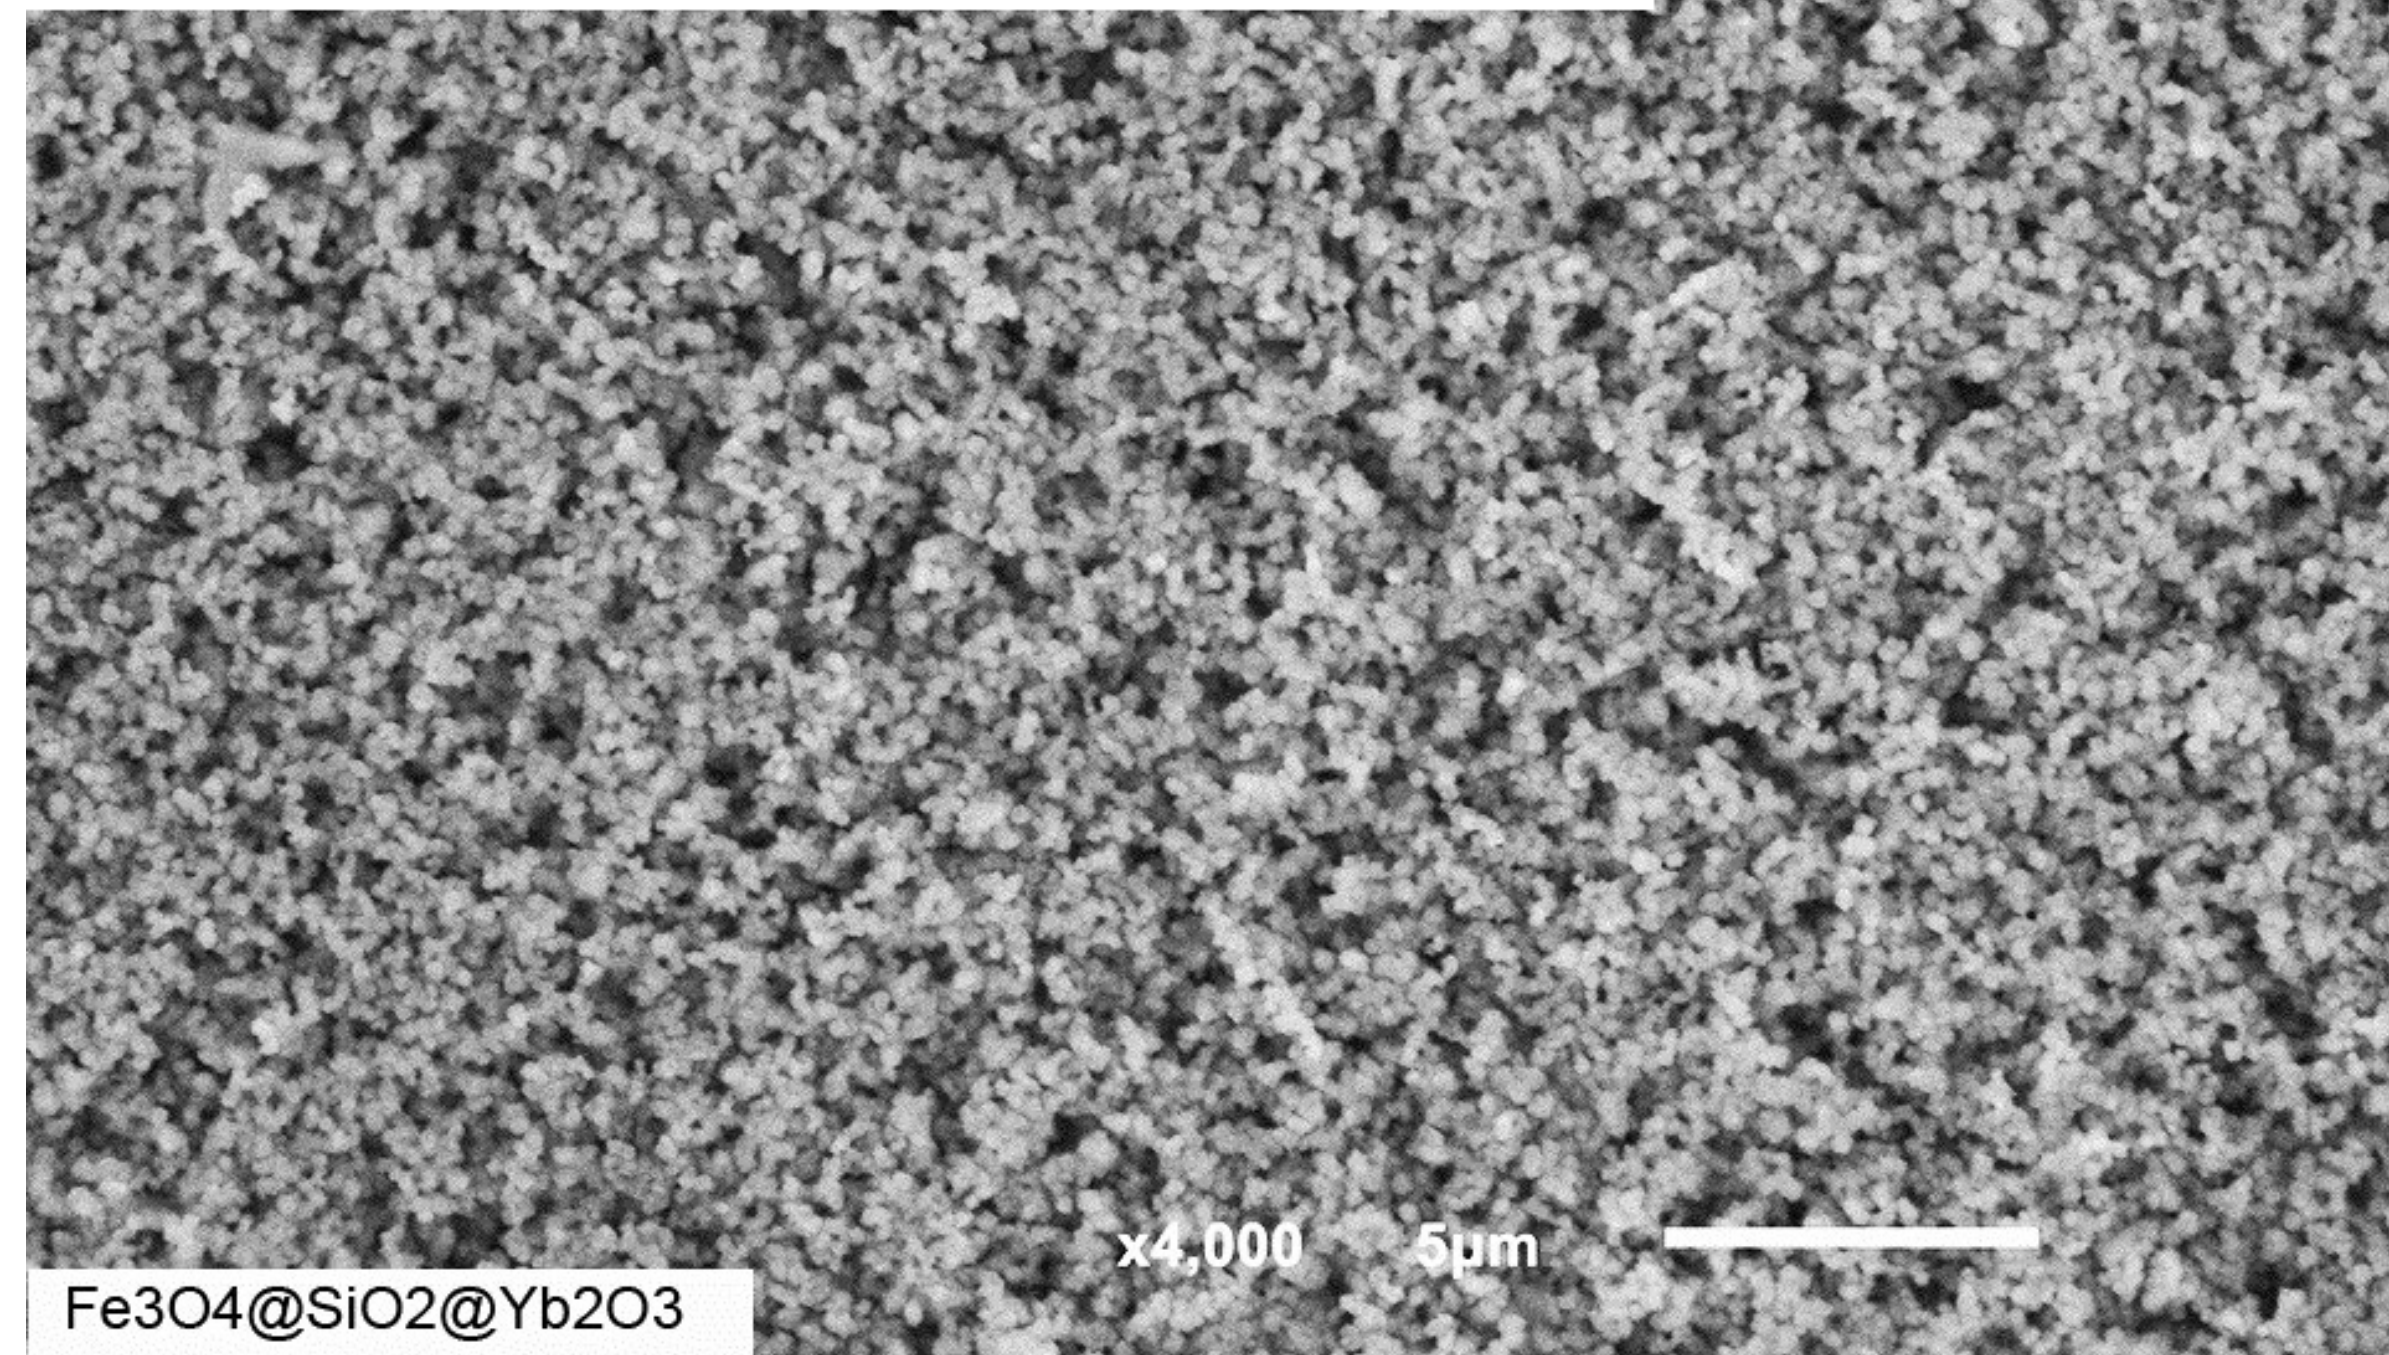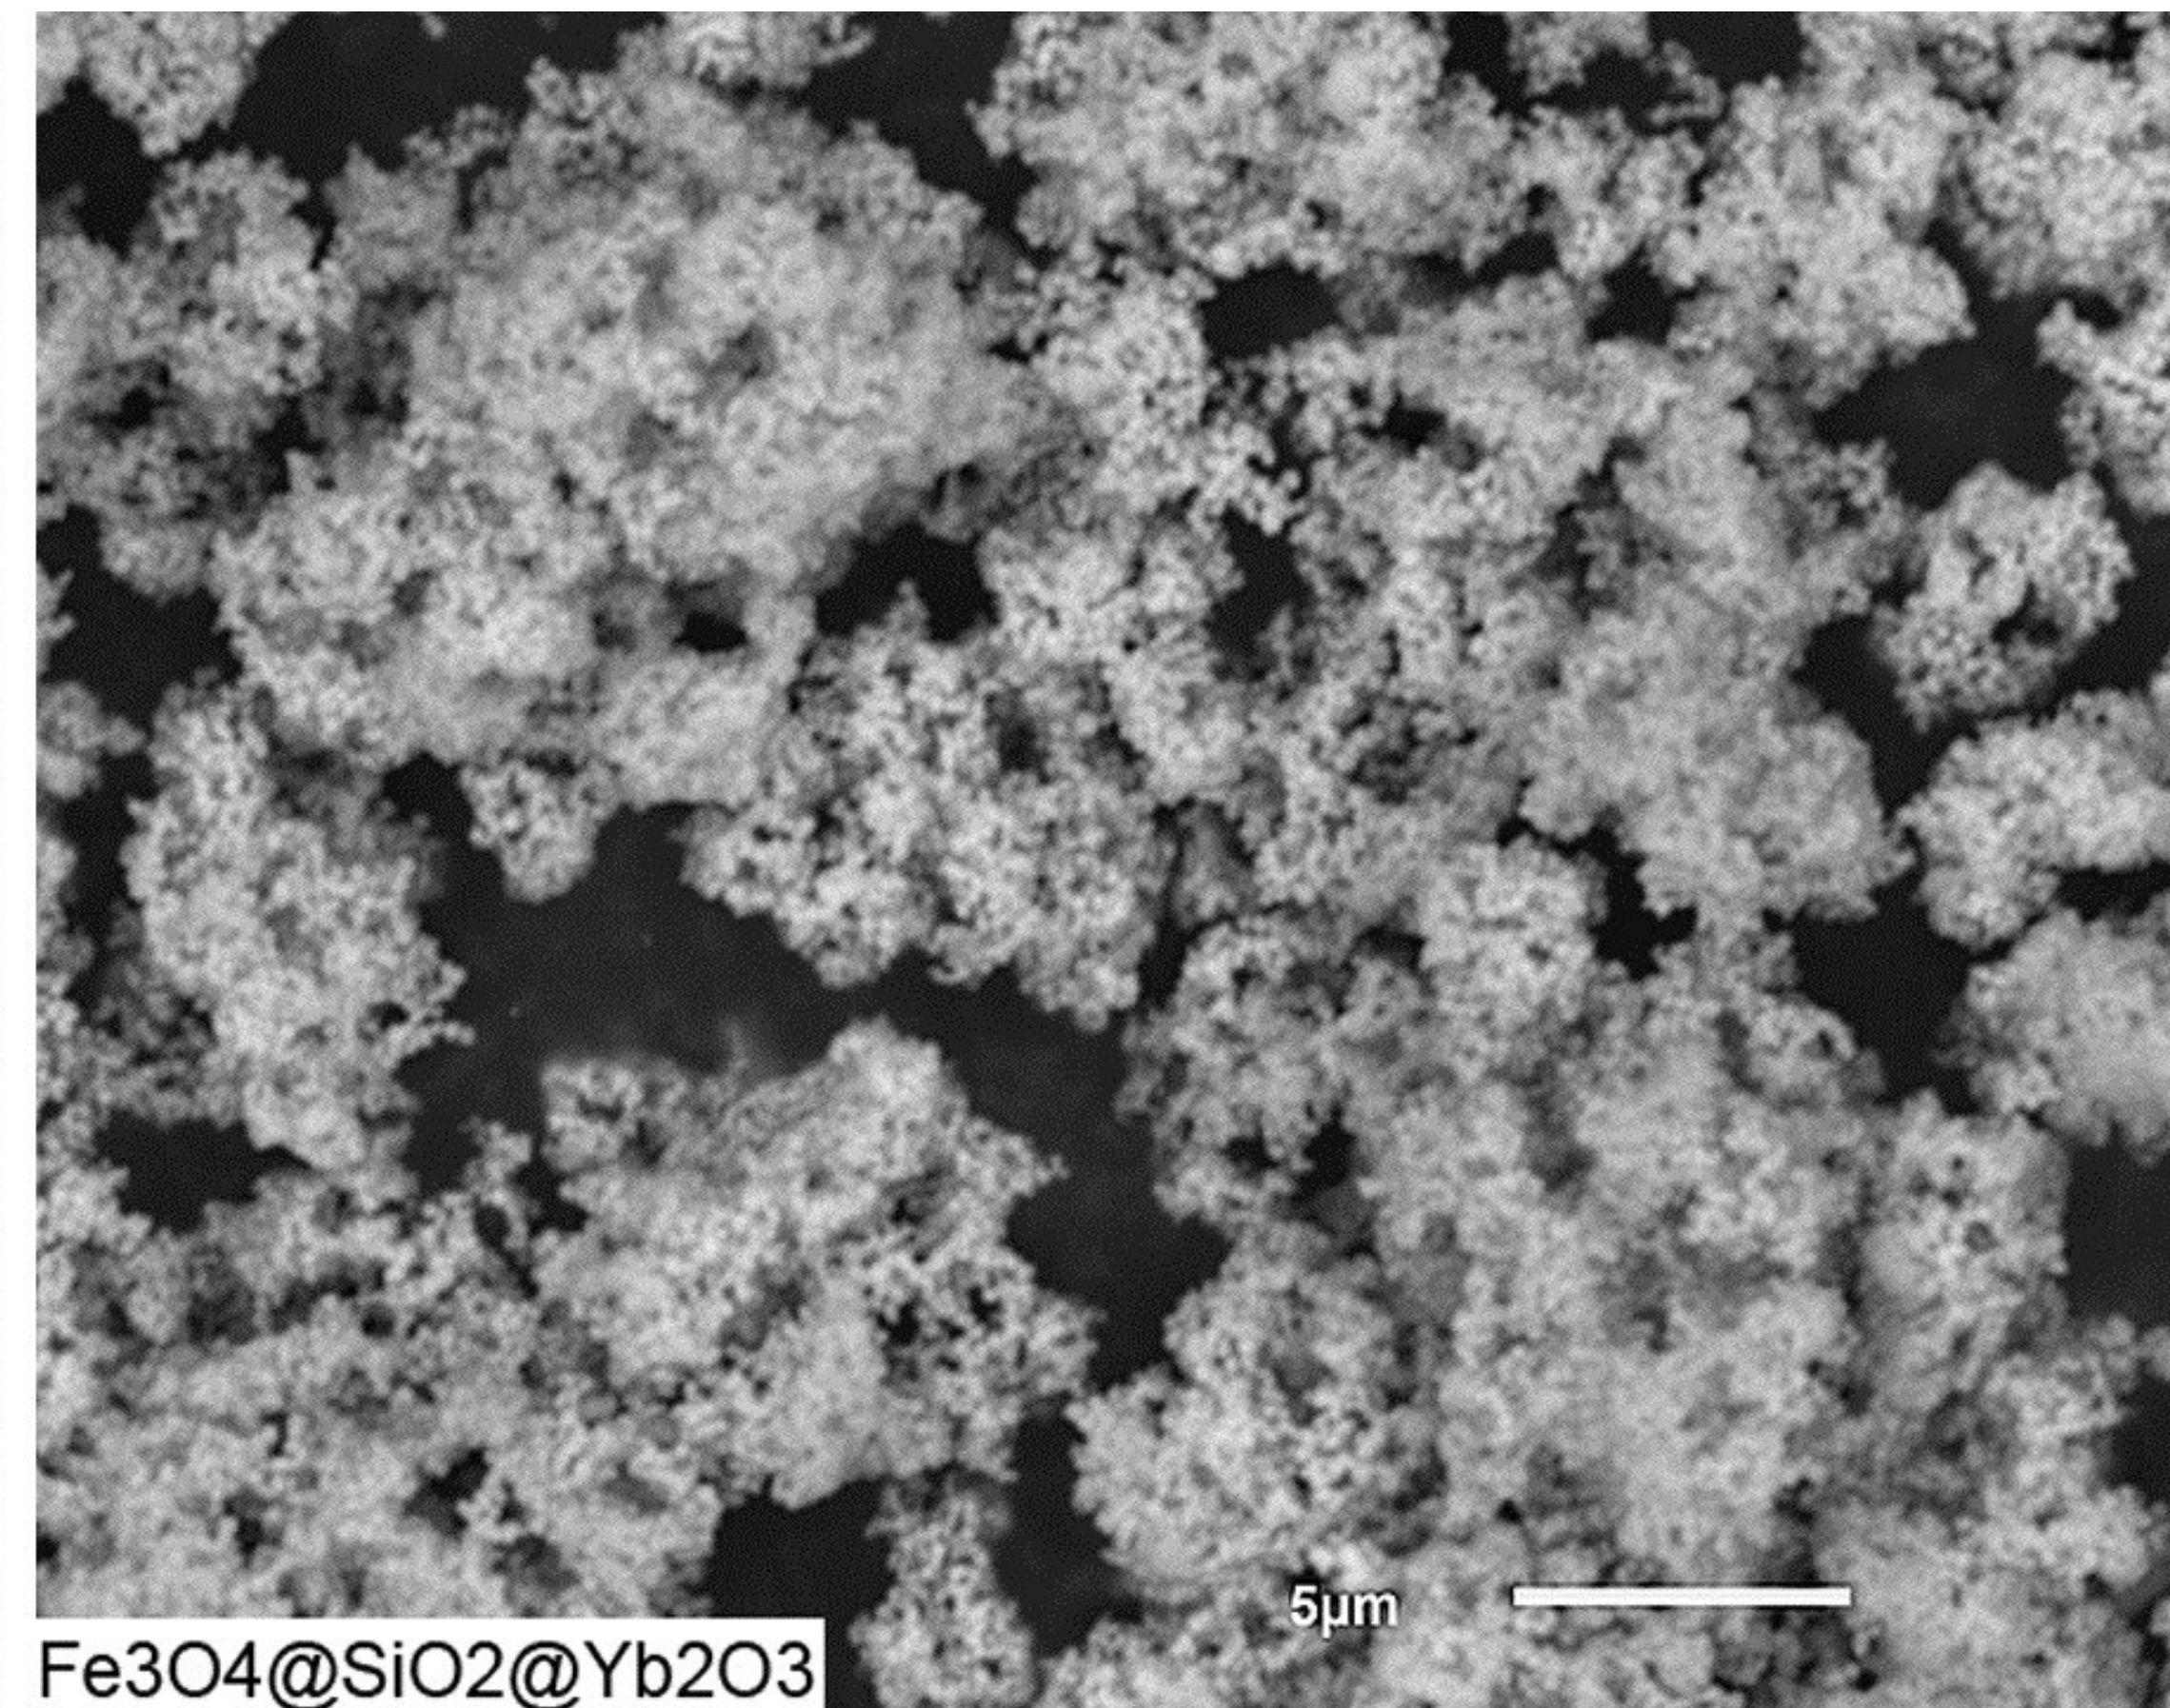

Supplement: c5ay03423j2.pdf [file c5ay03423j2.pdf]
